# Supplementary material
Source: PubMed Central journal article supplement (PMC6007094)
Supplement: AEM.00507-18_zam013188590s1.pdf [file AEM.00507-18_zam013188590s1.pdf]

1 **SUPPLEMENTARY MATERIAL FOR:**

2  
3 **Quantitative survival of *Leptospira interrogans* in soil and water microcosms**

4  
5 Arnau Casanovas-Massana<sup>a#</sup>, Gabriel Ghizzi Pedra<sup>b</sup>, Elsio A. Wunder Jr<sup>a</sup>, Peter J. Diggle<sup>c</sup>, Mike  
6 Begon<sup>b</sup> and Albert I. Ko<sup>a,d#</sup>

7  
8  
9 <sup>a</sup>Department of Epidemiology of Microbial Diseases, School of Public Health, Yale University,  
10 New Haven, Connecticut, USA.

11 <sup>b</sup>Institute of Integrative Biology, The University of Liverpool, Liverpool, United Kingdom

12 <sup>c</sup>Faculty of Health and Medicine, University of Lancaster, Lancaster, United Kingdom

13 <sup>d</sup>Centro de Pesquisas Gonçalo Moniz, Fundação Oswaldo Cruz, Ministério da Saúde, Salvador,  
14 Bahia, Brazil

15  
16 **#Address correspondence to:**

17 Arnau Casanovas-Massana: [arnau.casanovas@yale.edu](mailto:arnau.casanovas@yale.edu)

18 Albert I. Ko: [albert.ko@yale.edu](mailto:albert.ko@yale.edu)

19  
20  
21  
22  
23  
24 **1. Supplementary tables:** Page S2-S3

25 **2. Supplementary figures:** Page S4

26 **3. Supplementary methods:** Page S5-S13

27 **4. References**

28

29

30

31

32 **1. SUPPLEMENTARY TABLES**

33

34 **Table S1.** Candidate models with effects of the covariates on  $\alpha$  and  $\phi$  and Likelihood Ratio test  
 35 (LR) showing the best model. The final model selected is highlighted in bold.

36

|                                     | <b>Log</b>        |           |             |           |
|-------------------------------------|-------------------|-----------|-------------|-----------|
|                                     | <b>Likelihood</b> | <b>k*</b> | <b>df**</b> | <b>LR</b> |
| Null model                          | -739.74           | 5         | -           | -         |
| Treatment                           | -738.08           | 7         | 2           | 0.19      |
| Species                             | -736.08           | 7         | 2           | 0.03      |
| Method                              | -716.83           | 7         | 2           | <0.0001   |
| Medium                              | -496.32           | 15        | 10          | <0.0001   |
| Medium                              | -496.32           | 15        | -           | -         |
| Medium+species                      | -458.25           | 17        | 2           | <0.0001   |
| Medium+Method                       | -265.09           | 17        | 2           | <0.0001   |
| Medium+Method                       | -265.09           | 17        | -           | -         |
| <b>Medium+Method+Species</b>        | -201.46           | 19        | 2           | <0.0001   |
| Medium+Method+Medium*Method         | -257.89           | 25        | 8           | 0.072     |
| Medium+Method+Species               | -201.46           | 19        | -           | -         |
| Medium+Method+Species+Medium*Method | -196.59           | 27        | 8           | 0.28      |

37 \* Number of parameters;

38 \*\* Degrees of freedom is based in the difference between the number of parameters of each pair  
 39 of comparison.

40

41

42

43

44

45

46

47

48 **Table S2.** Primers and probes used in this study.

| Primer or probe | Sequence (5'→ 3')                  | Reference  |
|-----------------|------------------------------------|------------|
| LipL32-45F      | AAG CAT TAC CGC TTG TGG TG         | (1)        |
| LipL32-286R     | GAA CTC CCA TTT CAG CGA TT         |            |
| LipL32-189P     | FAM-AAA GCC AGG ACA AGC GCC G-BHQ1 |            |
| rpoB-F          | ATG ATG AGA CGG ATG ACT GC         | This study |
| rpoB-R          | CGA CGA AAC GTT TGA ACC AA         |            |

49  
50  
51  
52  
53  
54  
55  
56  
57  
58  
59  
60  
61  
62  
63  
64  
65  
66  
67  
68  
69  
70  
71

72 **2. SUPPLEMENTARY FIGURES**

73

74 **Figure S1.** Fate of *L. interrogans* (A) and *L. biflexa* (B) DNA markers measured by qPCR in  
75 microcosms of spring water (squares), soil (circles) and EMJH media (triangles) spiked with  
76 heat-killed cells. Open symbols represent data points for which at least one observation was  
77 below the limit of detection. Error bars indicate standard deviations.

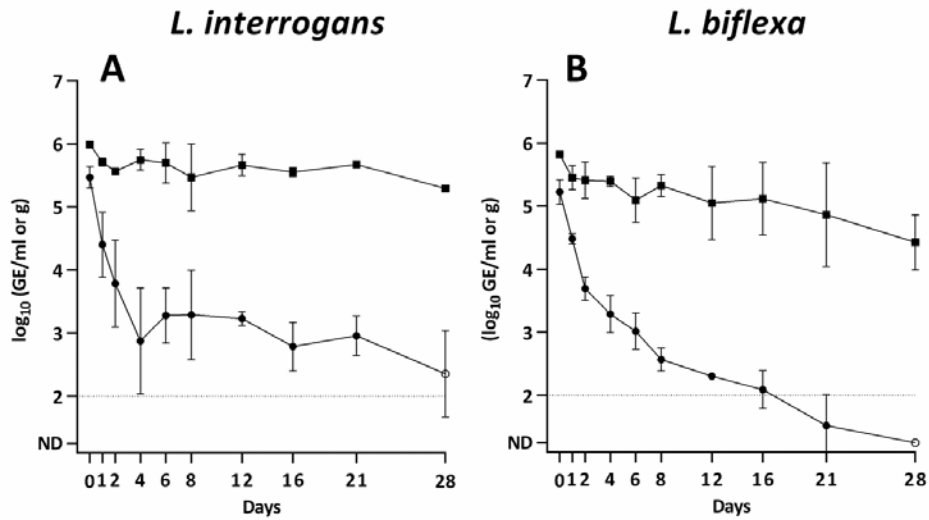

78

79

80

81

82

83

84

85

86

87

88

89

90

91

92

93 **3. SUPPLEMENTARY METHODS:**

94 **3.1 DNA Extraction Optimization**

95 **3.1.1 Methods**

96 Soil samples were extracted using the Power Soil™ DNA Isolation Kit (Mobio, Carlsbad, CA,  
97 USA), with some modifications. Briefly, 9 mL of PBS was added to the 1g soil samples in a 15-  
98 mL tube, followed by vortexing for 2 min. Tubes were kept in vertical position for 20 min to allow  
99 the sediments to settle. The supernatant was recovered, centrifuged at 20,000 g for 20 min, the  
100 supernatant discarded and the pellet resuspended in 1 mL PBS. The sample was transferred to a 2-  
101 mL screw-cap tube included in the kit whose content (beads and lysis solution) had been previously  
102 removed. The tube was centrifuged at 20,000 g for 20 min and all the supernatant discarded. The  
103 beads and lysis solution were added back to the screw-cap tube and the DNA extraction protocol  
104 was followed as indicated by the manufacturer.

105 Spring water samples and EMJH samples were extracted using a bead beating with  
106 phenol/chloroform/isoamyl alcohol method. Briefly, 1 mL spring water sample was spiked with  
107 100 µl of a stationary culture of *E. coli* K12 to improve cell pelleting. The mixture was centrifuged  
108 in a 2-mL screw-cap tube at 20,000 g for 20 min, and the supernatant carefully discarded. The  
109 pellet was mixed with 400 µL of extraction buffer

110 100 mM Tris-HCL pH=8.0; 1.4 M NaCl; 20 mM EDTA; 2% (w/v) CTAB; 0.2% (v/v) β-  
111 mercaptoethanol), 400 µL chlorophorm/isoamlyalcohol (24:1 v/v), 400 µl phenol, and a  
112 combination of acid-washed glass beads (1 piece of 3 mm, 0.25 g of 1 mm and 0.37g of 0.1-0.11  
113 mm). Then, the tube was bead beat for 5 min using a Bullet Blender (Next Advance, NY, USA),  
114 followed by centrifugation at 14,000 g for 10 min. The aqueous layer was transferred to a new 1.5-  
115 mL microtube containing 500 µL of chlorophorm/isoamlyalcohol (24:1 v/v), vortexed for 2 min  
116 and centrifuged at 14,000 g for 10 min. The aqueous layer was transferred to a new tube, and the  
117 DNA precipitated using 1 volume of isopropanol and incubating the sample overnight at room  
118 temperature. After incubation, the samples were centrifuged at 14,000 g for 15 min, and the DNA  
119 pellet was double washed with 70% ice-cold ethanol. The pellet was allowed to dry out, and finally  
120 resuspended in 50 µL of Tris-HCl 10mM pH=8.0.

121

122

123

124  
125  
126  
127  
128

### 3.1.2 Results

**Figure 1.** Modelling of the DNA extraction methods evaluated for spring water (A) and soil matrices (B).

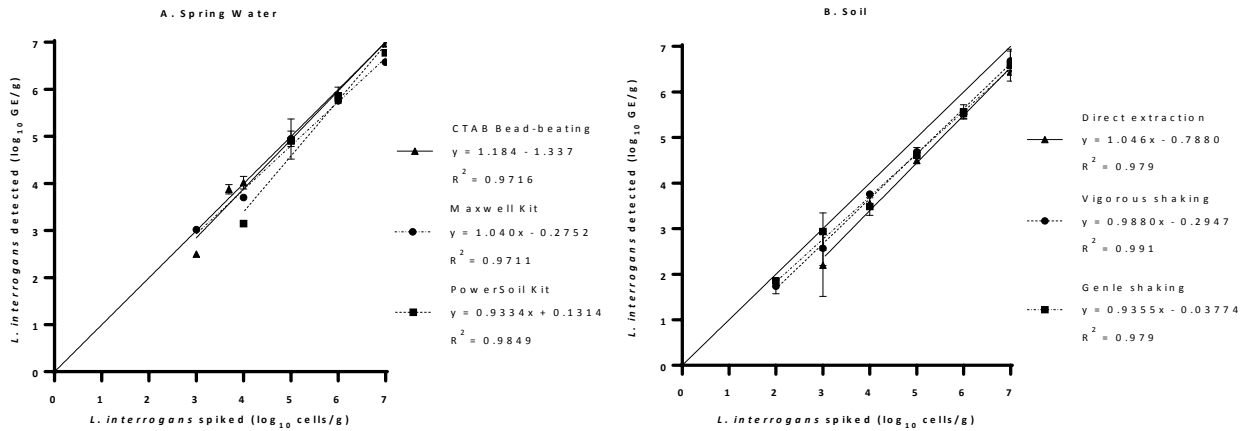

129

### 3.2 qPCR assays

#### 3.2.1 Design of a qPCR for *L. biflexa* Patoc

*L. biflexa* Patoc was quantified using a newly designed SYBR-Green® reaction amplify the *rpoB* gene. Specific primers were designed to amplify the *rpoB* gene using the complete genome (access number: NC\_010602). After primer design, a BLAST analysis was performed to confirm their specificity for the target genes. Reaction mixtures (20 µl) contained 10.0 µl IG™ SYBR-Green® Supermix (BioRad), 300 nM of each primer, 0.2 µg/µL of bovine serum albumin (Invitrogen) and 5 µl of DNA extract. The thermal-cycler conditions were as follow: an initial setup of 2 min at 50°C, followed by 10 min at 95°C, and 40 cycles of amplification (15 s at 95°C and 1 min at 60°C). Product specificity was confirmed by melting curve analysis (60-95°C, 0.3°C per read, 30 s hold). Standard curves were constructed using genomic DNA obtained from strain Patoc1 with concentrations ranging from 10<sup>7</sup> to 10<sup>0</sup> GE (genomic equivalents)/5µL, based on its respective genome size (2). All the samples and standards were run in duplicate and non-template controls were included in each row of the plates. All amplifications were performed in a 7500 Fast Real-Time PCR System (Life Technologies). Pair primers used for are detailed in Table S2. Calibration curves were included in each qPCR run and efficiencies were always higher than 90.5%.

147

148 **Figure 2.** *L. biflexa* qPCR standard curve prepared with plasmids as described above for *rpbO*  
149 gene. The data presented are the averages of six replicates performed in six independent  
150 experiments.

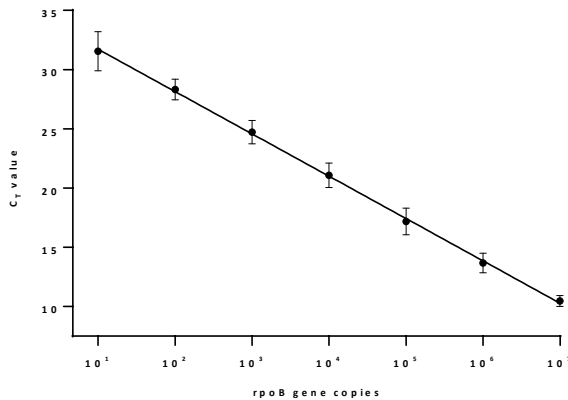

151

152

### 153 3.2.2 *L. interrogans* qPCR assay

154 *L. interrogans* was quantified using a TaqMan® assay targeting the *lipL32* gene with minor  
155 modifications (3). Reaction mixtures (25 µL) contained 12.5 µL Platinum® qPCR SuperMix (Life  
156 Technologies), 500 nM of primers LipL32-45F and LipL32-286R (Table S2), 100 nM of LipL32-  
157 189P probe, 0.2 µg/µL of bovine serum albumin (Ambion) and 5 µL of DNA template.  
158 Amplifications were performed in a 7500 Fast Real-Time PCR System (Applied Biosystems). The  
159 thermal cycling conditions consisted of an initial setup of 2 min at 50°C, followed by 2 min at  
160 95°C, and 40 cycles of amplification (15 s at 95°C and 1 min at 60°C). All samples, controls and  
161 calibrators were run in duplicate. Non-template controls were randomly included in each row of  
162 the 96-well plates. Genomic DNA from *L. interrogans* serovar Copenhageni strain Fiocruz L1-  
163 130 was extracted using the automated Maxwell® 16 Cell DNA Purification Kit (Promega) and  
164 quantified with Nanodrop 2000 (Thermo Fisher Scientific). The DNA was serially 10-fold diluted  
165 to construct calibration curves with concentrations ranging from  $2 \times 10^9$  to  $2 \times 10^2$  GEq/mL.  
166 Genomic equivalents were calculated based on the genome size of the Fiocruz L1-130 strain (4).  
167 Calibration curves were included in each qPCR run and efficiencies were always higher than  
168 92.5%.

169

170

171

### 172 **3.2.3 Internal Amplification Control (IAC)**

173 qPCR inhibition was monitored in each environmental sample by qPCR using the an IAC  
174 plasmid (3). Three DNA extracts from each microcosms replicate were randomly selected and  
175 spiked with 200 copies of the IAC in duplicate. As criteria for inhibition, we established a limit of  
176 2 standard deviations above the mean quantification cycle ( $C_q$  of  $32.63 + 1.51$ ), which was based  
177 on  $C_q$  values obtained from 30 control amplifications of IAC in ultrapure water in 7 independent  
178 qPCR runs. DNA extracts were assumed to be free of qPCR inhibitors when their mean  $C_q$  value  
179 fell below that limit. There was no evidence of inhibition of the molecular assays in any of the  
180 microcosms.

181

## 182 **3.3 Optimization of a PMA treatment to discriminate live and dead *L. interrogans* cells**

### 183 **3.3.1 Methods**

184 The ability of propidium monoazide (PMA) to selectively amplify DNA from membrane-intact  
185 *L. interrogans* cells in spring water and soil was investigated. A mid log phase culture of *L.*  
186 *interrogans* Copenhageni strain Fiocruz L1-130 was adjusted to a concentration of 108 cells/mL  
187 in a total volume of 5 mL of EMJH medium and then divided into 2.5 mL aliquots. To disrupt the  
188 membranes, one of the aliquots was heat-killed by exposure to 80°C for 15 min using a water bath  
189 with subsequent cooling to room temperature for 20 min.

190 For spring water experiments 100  $\mu$ L of each culture were spiked to 900  $\mu$ L of spring water in  
191 light-transparent 1.5 mL microtubes to achieve a final concentration of 107 cells/mL. A solution  
192 of 2 mM of PMA (Biotium) was prepared with ultrapure water and added to the 1 mL spring water  
193 cell suspensions to obtain a final concentration of 10 $\mu$ M. Samples were thoroughly mixed by  
194 inverting the tubes several times after the PMA addition and incubated in the dark for 15, 30, 45  
195 or 60 min with frequent mixing. After the PMA cross-linking time, tubes were placed on ice to  
196 avoid excessive heating and exposed for 5 min to a 600W halogen light source placed 20 cm above  
197 the samples. Then, 100  $\mu$ L of a stationary culture of *E. coli* K12 was added to the tubes to improve  
198 cell pelleting and were centrifuged at 20,000 g for 20 min. The supernatant was discarded, and the  
199 pellet recovered in 400  $\mu$ L of PBS by vortexing for 1 min. Finally, DNA was extracted using the  
200 automated Maxwell® 16 Cell DNA Purification Kit (Promega) and quantified using the qPCR  
201 procedure described above.



202 For soil samples, 100  $\mu$ L of each culture were spiked to 0.9 g of soil in 15 mL tubes to achieve  
203 a final concentration of  $10^7$  cells/g. Then, 9 mL of PBS was added to the samples, followed by  
204 mixing for 1 hour in a horizontal agitator at maximum speed. Tubes were kept in vertical position  
205 for 20 min to allow the sediments to settle. The supernatants were recovered, centrifuged at 8,000  
206 g for 20 min, and the pellet resuspended in 1 mL PBS. The samples were transferred to light-  
207 transparent 1.5 mL microtubes and PMA was added at different final concentrations (50  $\mu$ M, 100  
208  $\mu$ M and 200  $\mu$ M). Samples were thoroughly mixed by inverting the tubes several times after the  
209 PMA addition and incubated in the dark for 15 minutes. Then, tubes were placed on ice and  
210 exposed for 15 min to a 600W halogen light source placed 20 cm above the samples. After the  
211 light exposure, soil samples were extracted following the procedure detailed in the Supplementary  
212 Material 1, and quantified using the qPCR procedure described above.

213 All manipulations of PMA were performed under minimal light to avoid any chemical damage  
214 to the light-sensitive PMA structure and all experiments were conducted in three biological  
215 replicates. A microtube with live cells and another with heat-killed not treated with PMA were  
216 included as a control.

217

### 218 3.3.2 Results

219 Increasing incubation time of PMA with samples in spring water lead to a decrease of the  
220 qPCR ability to detect DNA from heat-killed cells without affecting the detection of live cells (Fig.  
221 1 A). As a result, we selected a 60 min treatment with 5  $\mu$ M PMA for subsequent experiments. In  
222 Brazilian soil, the increase of PMA concentration also decreased the qPCR signal in heat-killed  
223 cells. However, the treatment with 200  $\mu$ M of PMA decreased significantly the detection from live  
224 cells (Fig. 1B). We selected a 15 min treatment with 100  $\mu$ M of PMA for subsequent experiments,  
225 since it showed an efficient elimination of heat-killed cells signal without compromising the live  
226 cells. Unfortunately, after testing various PMA concentrations, and incubation and illumination  
227 times (data not shown) the attempts to optimize a PMA treatment for US soil were unsuccessful.

228

229

230 **Figure 3.** Effect of the PMA treatment on the DNA quantification by qPCR. (A) Effect of the  
231 increasing incubation time with PMA on the signal detected in spring water (B) Effect of the

232 increasing PMA concentration on the signal detected in Brazilian soil. White squares denote live  
 233 cells and black squares heat-killed cells.

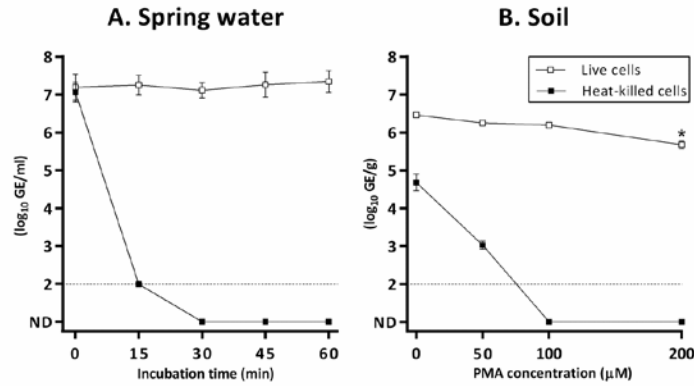

234  
 235 **3.4 Modeling**  
 236 **3.4.1 Model**

237 Following Peleg and Cole, 1988 and van Boekel, 2002 (5, 6) we used a Weibull distribution to  
 238 model the survival time,  $T$ , with survivor function:

$$S(t; \phi, k) = P(T > t) = \exp\left(-\left(\frac{t}{\phi}\right)^k\right); t \geq 0 \tag{1}$$

239  
 240 The parameter  $k$  determines the shape of the survival curve, whilst  $\phi$  defines how stretched the  
 241 shape is; specifically,  $\phi$  is the expectation (average value) of  $T_k$ . it follows from (1) that if we  
 242 consider a closed population of cells with initial concentration  $\mu_0$  at time  $t=0$  and measure the  
 243 concentration of surviving cells at a subsequent time  $t$ , the expected concentration at time  $t$  is  $\mu_t =$   
 244  $\mu_0 S(t; \phi, \kappa)$ . However, in our experiments, we observed that a proportion of the cells appeared to  
 245 survive well beyond the maximum follow-up time. We therefore extended the model to  $\mu_t =$   
 246  $\mu_0(\alpha + (1 - \alpha)S(t; \phi, \kappa))$ , where  $\alpha$  is the proportion of long-term survivors.

247 We now consider a set of experiments,  $i=1, \dots, r$ , the  $i$ th of which is characterized by the values of  
 248 a set of covariates  $x_i$ . In each experiment we measure the concentration at a sequence of times  
 249  $t_j; j = 1, 2, \dots, m$ . Our model for the complete set of experiments becomes:

$$\mu_{ij} = \mu_0 * (\alpha_i + (1 - \alpha_i) * (S(t_j; \phi_i, \kappa))) \tag{2}$$

250  
 251

252 In equation (2), the effects of the covariates on the values of  $\phi$  and  $\alpha$  were explored to determine  
 253 if there were any differences in survival between species, treatment and method of quantification  
 254 by specifying log-linear and logistic models for  $\phi$  and  $\alpha$  respectively, hence:

$$\phi_i = e^{x_i' \beta} \tag{3}$$

257 and

$$\alpha_i = 1 / (1 + e^{-x_i' \gamma}) \tag{4}$$

260 Finally, we assume that observed concentration  $Y_{ij}$  are independent and Normally distributed,

$$Y_{ij} = \mu_{ij} + Z_{ij} \quad i = 1, \dots, r; j = 1, \dots, m \tag{5}$$

261 where  $Z_{ij}$ , the observation level residuals, are Normally distributed  $Z_{ij} \sim N(0, \tau^2)$ .

### 264 3.4.2 Log-likelihood

265 The log-likelihood for the complete set of data contains contributions of two kinds:  
 266 measured values  $y_{ij}$  and results recorded only as below-detection, representing values  $y_{ij} < d$ . Let  
 267  $f(y; \mu, \tau^2)$  denote the probability density, and  $F(y; \mu, \tau^2)$  the cumulative probability distribution,  
 268 of the Normal distribution mean  $\mu$  and variance  $\tau^2$ . Then, the log-likelihood for the complete set  
 269 of parameters  $\theta = (\beta, \gamma, \mu_0, \tau^2)$  is:

$$l(\theta) = \sum_{i=1}^r \sum_{j=1}^m l_{ij}(\theta) \tag{6}$$

272 where:

273 for observations  $y_{ij}$ ,  $l_{ij}(\theta) = \log f(y; \mu_{ij}, \tau^2)$ ;

274 for observations  $y_{ij} < d$ ,  $l_{ij}(\theta) = \log F(d; \mu_{ij}, \tau^2)$ ;

276 The parameters were estimated by optimizing the log-likelihood function, using the *optim()*  
 277 function in the R software (7)

278

279

280 **3.4.3 Confidence intervals**

281 95% Confidence intervals for individual parameters  $(\beta, \lambda, \mu_0, k)$  were calculated as

282  
283 
$$\hat{\theta} \pm 1.96SE(\hat{\theta})$$
  
284 (7)

285 where SE denotes the square root of the variance of  $\hat{\theta}$  as given by the information matrix. To  
286 calculate 95% confidence intervals for  $\phi_i$  we calculate the variance of  $\log(\phi)$  as  $v =$   
287  $x_i'Var(\hat{\beta})x_i$ , calculate limits  $a$  and  $b$  as  $x_i'\hat{\beta} \pm 1.96\sqrt{v}$ , then transform  $a$  and  $b$  to give the  
288 confidence interval  $(e^a, e^b)$ . Similarly, to calculate 95% confidence intervals for  $\alpha_i$ , we calculate  
289  $v = x_i'Var(\hat{\gamma})x_i$ , calculate limits  $a$  and  $b$  as  $x_i'\hat{\gamma} \pm 1.96\sqrt{v}$ , then transform  $a$  and  $b$  to give the  
290 confidence interval  $(1/(1 + e^{-a}), 1/(1 + e^{-b}))$ .

291  
292 **3.4.4 Checking assumptions**

293 A plot of standardized residuals against fitted values was inspected to check the fit of the model to  
294 the data. The plot (Figure 1) indicates a reasonably good fit. NOTE: only one panel is needed.

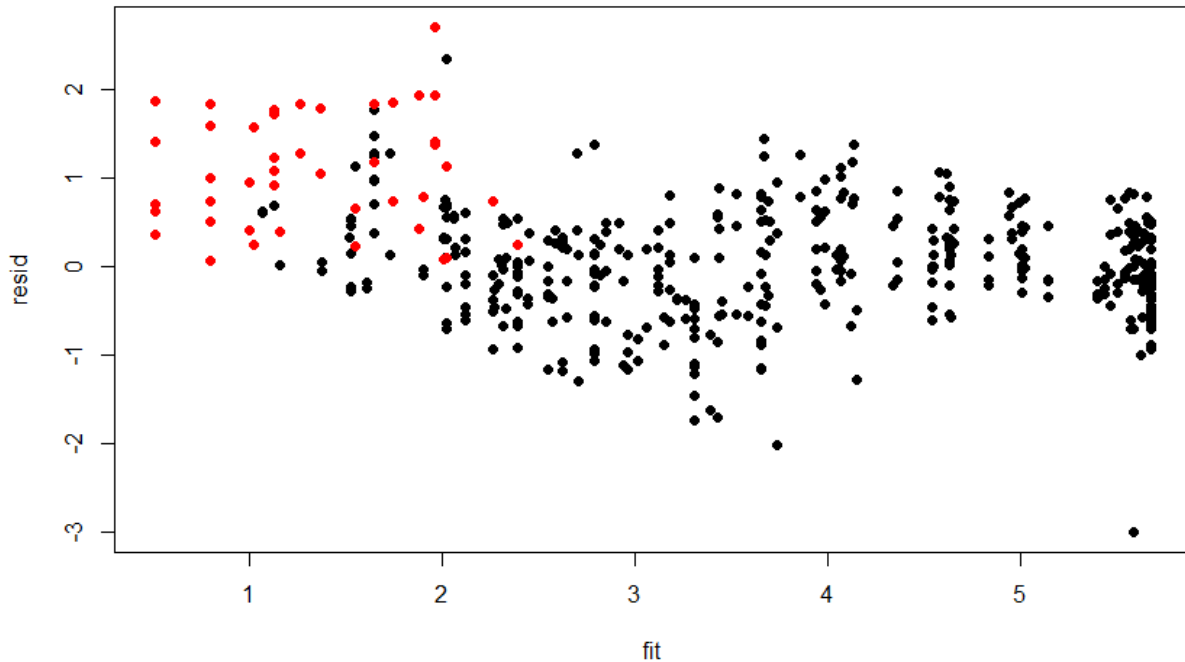

295  
296 **Figure:** Standardized residuals vs fitted values. The red dots are the fitted values for below detection limit.

### 297 **3.4.5 Model selection**

298 The selection of the covariates in the model was based on a Likelihood ratio test (LRT),  
299 whereby twice the difference between the log-likelihoods of two nested models is compared with  
300 critical values of a chi-squared distribution with degree of freedom equal to the difference in the  
301 number of parameters in the two models. Firstly, the main effect of each covariate was tested  
302 against a null model with no covariates. Then, interactions were tested against the selected main-  
303 effects-only model.

304

## 305 **4. REFERENCES**

- 306 1. **Stoddard RA, Gee JE, Wilkins PP, McCaustland K, Hoffmaster AR.** 2009. Detection  
307 of pathogenic *Leptospira* spp. through TaqMan polymerase chain reaction targeting the  
308 *LipL32* gene. *Diagn. Microbiol. Infect. Dis.* **64**:247–55.
- 309 2. **Picardeau M, Bulach DM, Bouchier C, Zuerner RL, Zidane N, Wilson PJ, Creno S,**  
310 **Kuczek ES, Bommezzadri S, Davis JC, McGrath A, Johnson MJ, Boursaux-Eude C,**  
311 **Seemann T, Rouy Z, Coppel RL, Rood JI, Lajus A, Davies JK, Médigue C, Adler B.**  
312 2008. Genome sequence of the saprophyte *Leptospira biflexa* provides insights into the  
313 evolution of *Leptospira* and the pathogenesis of leptospirosis. *PLoS One* **3**:e1607.
- 314 3. **Casanovas-Massana A, Costa F, Riediger IN, Cunha M, de Oliveira D, Mota DC,**  
315 **Sousa E, Querino VA, Nery N, Reis MG, Wunder EA, Diggle PJ, Ko AI.** 2018. Spatial  
316 and temporal dynamics of pathogenic *Leptospira* in surface waters from the urban slum  
317 environment. *Water Res.* **130**:176–184.
- 318 4. **Nascimento ALTO, Verjovski-Almeida S, Van Sluys MA, Monteiro-Vitorello CB,**  
319 **Camargo LEA, Digiampietri LA, Harstkeerl RA, Ho PL, Marques MV, Oliveira**  
320 **MC, Setubal JC, Haake DA, Martins EAL.** 2004. Genome features of *Leptospira*  
321 *interrogans* serovar Copenhageni. *Brazilian J. Med. Biol. Res.* **37**:459–478.
- 322 5. **Peleg M, Cole MB.** 1998. Reinterpretation of Microbial Survival Curves. *Crit. Rev. Food*  
323 *Sci. Nutr.* **38**:353–380.
- 324 6. **van Boekel MAJ.** 2002. On the use of the Weibull model to describe thermal inactivation  
325 of microbial vegetative cells. *Int. J. Food Microbiol.* **74**:139–159.
- 326 7. **R Core Team.** 2013. A language and environment for statistical computing. 3.1. R  
327 Foundation for Statistical Computing, Vienna, Austria.
